# Supplementary material
Source: MDPI journal article supplement (https://www.mdpi.com/2311-7524/7/6/129)
Supplement: s1 [file s1]

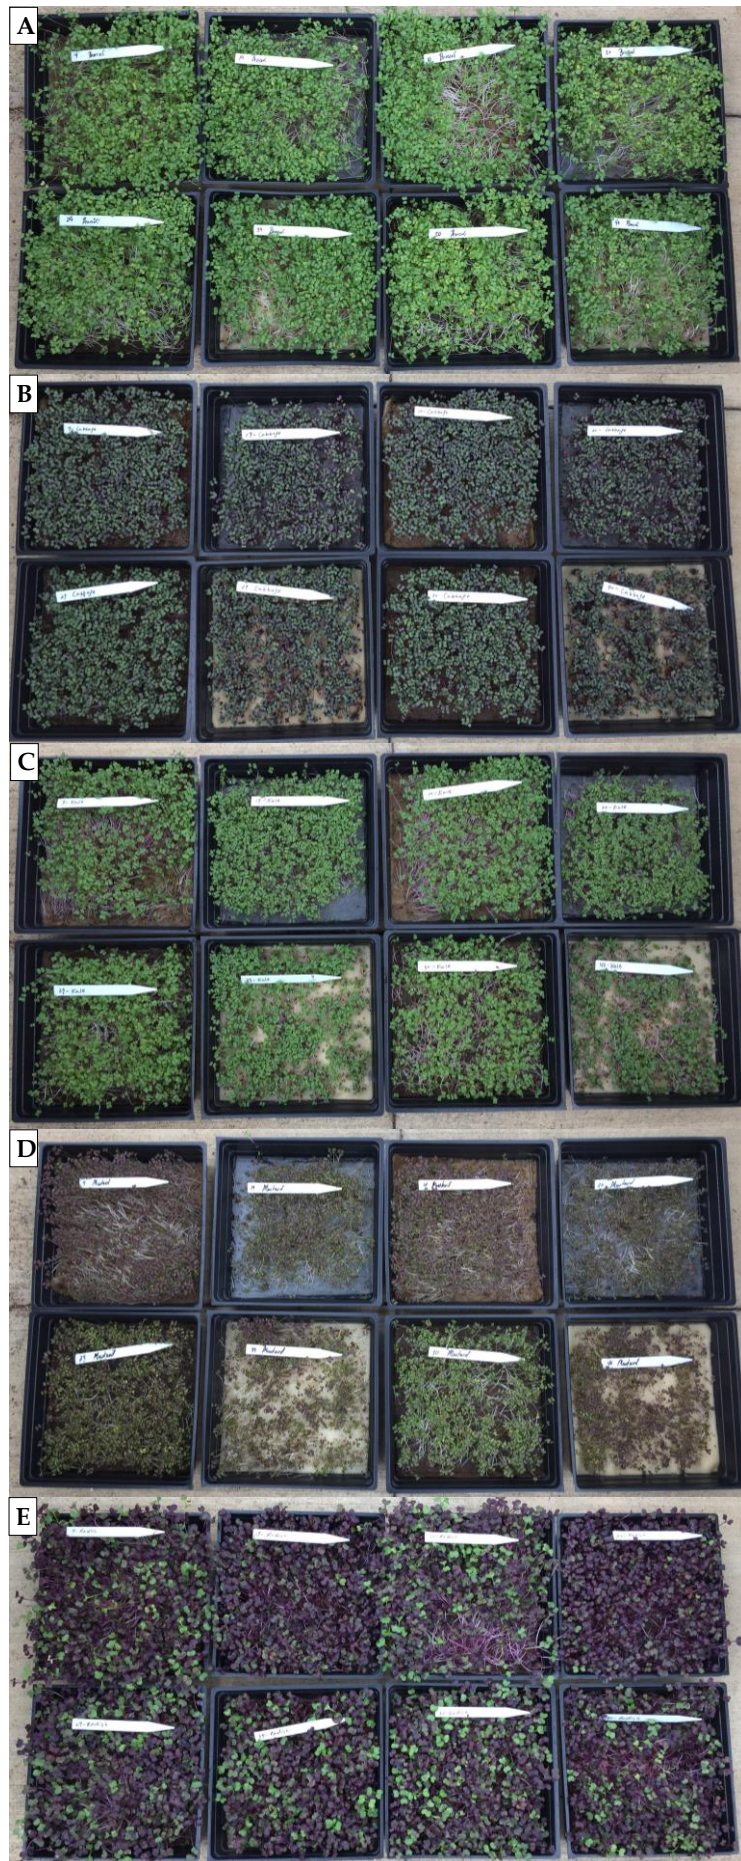

**Figure S1.** Growth stage of five microgreens at harvest including 'Waltham' broccoli (A), 'Red Acre' cabbage (B), 'Red Russian' kale (C), 'Red Garnet' mustard (D), and Rambo radish (E). Treatments in each picture are top row from left to right: hemp mat fertilized, biostrate fertilized, hemp mat not fertilized, and biostrate not fertilized; bottom row from left to right: jute mat fertilized, Micro-Mats fertilized, jute mat not fertilized, Micro-Mats not fertilized.
